# Supplementary material for: Ectopic Expression of Perilla frutescens WRI1 Enhanced Storage Oil Accumulation in Nicotiana benthamiana Leaves
Source: MDPI journal article supplement (doi:10.3390/plants12051081), 2023-02-28
Supplement: s1 [file s1]

A

|                                                                |      |
|----------------------------------------------------------------|------|
| ATGAAGAGAAAGTCTCCCTCACCAGCTTGCTCCTCCTCCTCCTCCTGCTGCATCGAA      | 60   |
| M K R K S P S P A C S S S S S C C I E                          | 20   |
| TCGCCAACCACGCAGAAAAATGCGCCGCAATCAAAGCCGACGCCGTCAAACCCAAGCCC    | 120  |
| S P T T Q K N A P Q S K P D A V K P K P                        | 40   |
| AAACGCGTTCGAGCGAAGAAAAACCAGAGCCACAGCAATTCCGCCACCTCCCCTAAATCG   | 180  |
| K R V R A K K N Q S H S N S A T S P K S                        | 60   |
| CGAAGCTCCATCTACAGAGGCGTCACTAGGCATAGATGGACCGGAGGTATGAAGCTCAC    | 240  |
| R S S I Y R G V T R H R W T G R Y E A H                        | 80   |
| CTCTGGGATAAGACGACATGGAACAGCATTCAGAACAAGCGAGGAAGACAAATCTATTTA   | 300  |
| L W D K T T W N S I Q N K R G R Q I Y L                        | 100  |
| GGAGCTTATGATAATGAGGAAGATGCGGCTCGGACCTACGATCTAGCTGCCCTTAAATAT   | 360  |
| G A Y D N E E D A A R T Y D L A A L K Y                        | 120  |
| TGGGGCCCTGCTACTATCCTCAACTTTCCTGTAGAGGCCTACACCAAAGATCTTGAGGAG   | 420  |
| W G P A T I L N F P V E A Y T K D L E E                        | 140  |
| ATGCAAAAATTGACTAAGGAGGAGTATTTAGCCTCGCTTAGGCGGCGGAGTAGCGGCTTT   | 480  |
| M Q K L T K E E Y L A S L R R R S S G F                        | 160  |
| TCGCGGGGAGTTTCTAAGTATCGCGGTGTAGCAAGGCACCATCACAATGGCCGGTGGGAG   | 540  |
| S R G V S K Y R G V A R H H H N G R W E                        | 180  |
| GCTCGAATTGGGCGTGTGTTTGCGGAAACAAGTATCTCTACCTAGGAACCTACAGCACCCAA | 600  |
| A R I G R V C G N K Y L Y L G T Y S T Q                        | 200  |
| GAGGAAGCAGCAGCAGCATATGATATGGCAGCAATAGAATTCAGAGGTCCAAACGCTGTA   | 660  |
| E E A A A A Y D M A A I E F R G P N A V                        | 220  |
| ACAAATTTCGACGTAAGTAATTATGCAGATAAGTTAAAGAAATTCCTACCGGAGGTGCAT   | 720  |
| T N F D V S N Y A D K L K K F L P E V H                        | 240  |
| GTCAGACAGGAAGAGGTTTCATGTGAAGCAGGAAACCAATTCTGTATTCCCTGATGAAGAA  | 780  |
| V R Q E E V H V K Q E T N S V I P D E E                        | 260  |
| GTACAAGCAGTTGAAGCACAAGATAATCAAGAATATCCAAACCAGTTTGCTCAAACAAGT   | 840  |
| V Q A V E A Q D N Q E Y P N Q F A Q T S                        | 280  |
| ACACCTGAGCCAGAATCGAAAGATTCCATTGAGTCGGAAGACATACTCGTCATGGACCTG   | 900  |
| T P E P E S K D S I E S E D I L V M D L                        | 300  |
| TCCGAGGAGCACGAGAACCCCTTGGGATCTCTGTCTAGACACTGTATTCAATATCCTCCCA  | 960  |
| S E E H E N P W D L C L D T V F N I L P                        | 320  |
| ATCCCTGACCTTCCTCTGGGTAAAGCCTCCGAGGTATTTCGATTACCATGGTTTTTGAGGAC | 1020 |
| I P D L P L G K A S E V F D Y H G F E D                        | 340  |
| GATATTGAATGCATCTTCGACGAGCCATTAGATGATAATGAGAACTTCAGAATGCAATG    | 1080 |
| D I E C I F D E P L D D N E N F Q N A M                        | 360  |
| CTTGGATGCCAGGTTGATGCAGATGCTTTGGTATCTCAAAACTTGAAAGGGACGAATTCT   | 1140 |
| L G C Q V D A D A L V S Q N L K G T N S                        | 380  |
| CCTTCTTCTCCTTCITTCGTGCGCCATTATCATCGACCATATCAGCTTGCAGCAACATGTAA | 1200 |
| P S S P S S S P L S S T I S A C S N M *                        | 400  |

# B

|                                                                |             |      |
|----------------------------------------------------------------|-------------|------|
| ATGAAGAGAAAGTCTCCCTCACCAGCTTGCTCCTCCTCCTCCTCCT                 | CCTCCTGCTGC | 60   |
| M K R K S P S P A C S S S S S S S S                            | S S C C     | 20   |
| ATCGAATCGCCAACCGCGCAGAAAAATGCGCCGCAATCAAAGGCCGACGCCGTCAAACCC   |             | 120  |
| I E S P T A Q K N A P Q S K A D A V K P                        |             | 40   |
| AAGCCCCAACGCGTTTCGAGCGAAGAAAAACCAGAGCCACAGCAATTCCGCCACCTCCCCT  |             | 180  |
| K P K R V R A K K N Q S H S N S A T S P                        |             | 60   |
| AAATCGCGCAGCTCCATCTACAGAGGCGTCACTAGGCATAGATGGACTGGGAGGTACGAA   |             | 240  |
| K S R S S I Y R G V T R H R W T G R Y E                        |             | 80   |
| GCTCACCTCTGGGATAAGACGACATGGAACAGCATTCAGAACAAGCGAGGAAGACAAATC   |             | 300  |
| A H L W D K T T W N S I Q N K R G R Q I                        |             | 100  |
| TATTTAGGAGCTTATGATAATGAGGAAGATGCGGCTCGGACCTACGATCTAGCTGCCCTT   |             | 360  |
| Y L G A Y D N E E D A A R T Y D L A A L                        |             | 120  |
| AAATATTGGGGCCCTGCTACTATCCTCAACTTTCCTGTAGAGGCCTACACCAAAGATCTT   |             | 420  |
| K Y W G P A T I L N F P V E A Y T K D L                        |             | 140  |
| GAGGAGATGCAAAAATTGACTAAGGAGGAGTATTTAGCCTCGCTTAGGCGGGCGGAGTAGC  |             | 480  |
| E E M Q K L T K E E Y L A S L R R R S S                        |             | 160  |
| GGCTTTTTCGCGGGGAGTTTCTAAGTATCGCGGTGTAGCAAGGCACCATCACAAATGGCCGG |             | 540  |
| G F S R G V S K Y R G V A R H H H N G R                        |             | 180  |
| TGGGAGGCTCGAATTGGGCGCGTTTGCGGAAACAAGTATCTCTACCTAGGAACCTACAGC   |             | 600  |
| W E A R I G R V C G N K Y L Y L G T Y S                        |             | 200  |
| ACCCAAGAGGAAGCAGCAGCAGCATATGATATGGCAGCAATAGAATTCAGAGGTCCAAAC   |             | 660  |
| T Q E E A A A A Y D M A A I E F R G P N                        |             | 220  |
| GCTGTAACAAATTTTCGATGTAAGTAATTATGCAGATAAGTTAAAGAAATTCCTACCGGAG  |             | 720  |
| A V T N F D V S N Y A D K L K K F L P E                        |             | 240  |
| GTGCAAGTCAGACAGGAAGAGGTCATGTGAAGCAGGAAACCAATTCTGTTACCTTGAT     |             | 780  |
| V Q V R Q E E V H V K Q E T N S V T L D                        |             | 260  |
| GAAGAAGTACAAGCAGTTAAGCACAAAGATAATCAAGAATATCCAAACCAGTTTGCTCAA   |             | 840  |
| E E V Q A V K A Q D N Q E Y P N Q F A Q                        |             | 280  |
| ACAAGTACACCTGAGCCAGAATCGAAAGATTCCATTGAGTCGGAAGACATACTCGTCATG   |             | 900  |
| T S T P E P E S K D S I E S E D I L V M                        |             | 300  |
| GACCTGTCCGAGGAGCACGAGCACCTTGGGATCTCTGTCTAGACACTGTATTCAATATC    |             | 960  |
| D L S E E H E H P W D L C L D T V F N I                        |             | 320  |
| CTCCCAATCCCTGACCTTCCTCTGGGTAAAGCCTCCGAGGTATTCGATTACCATGGTTTT   |             | 1020 |
| L P I P D L P L G K A S E V F D Y H G F                        |             | 340  |
| GAGGACGATATTGAATGCATCTTCGACGAGCCATTAGATGATAATGAGAACTTCCAGAAT   |             | 1080 |
| E D D I E C I F D E P L D D N E N F Q N                        |             | 360  |
| GCAATGCTTGGATGCCAGGTTGATGCAGATGCTTTGGTATCTCAAACTTGAAAGGGACG    |             | 1140 |
| A M L G C Q V D A D A L V S Q N L K G T                        |             | 380  |
| AATTCTCCTTCGTCGTCGCCATTATCATCGACCATATCAGCTTGCAAGCAACATGTAA     |             | 1197 |
| N S P S S S P L S S T I S A C S N M *                          |             | 399  |

**Supplementary Figure S1. Nucleotide and deduced amino acid sequences of *P. frutescens* *WRI1A* and *WRI1B* isoforms**

The conserved AP2/ERF DNA binding motifs and transcriptional activation motif [36] in WRI1 are shown in green and yellow backgrounds, respectively. The non-conserved nucleotide and amino acid sequences between *PfWRI1A* and *PfWRI1B* are shown in dark-gray and light-gray backgrounds, respectively.

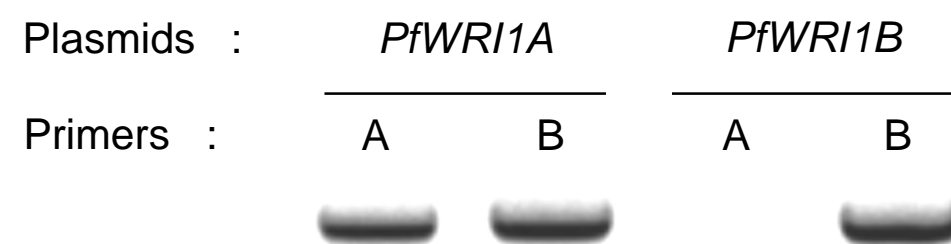

**Supplementary Figure S2. Design of *PfWRI1A*- or *PfWRI1B*- specific primers.**

Plasmids harboring *PfWRI1A* or *PfWRI1B* were used in PCR analysis as templates. The designed A- and B-specific primers are shown in Supplementary Figure S1.

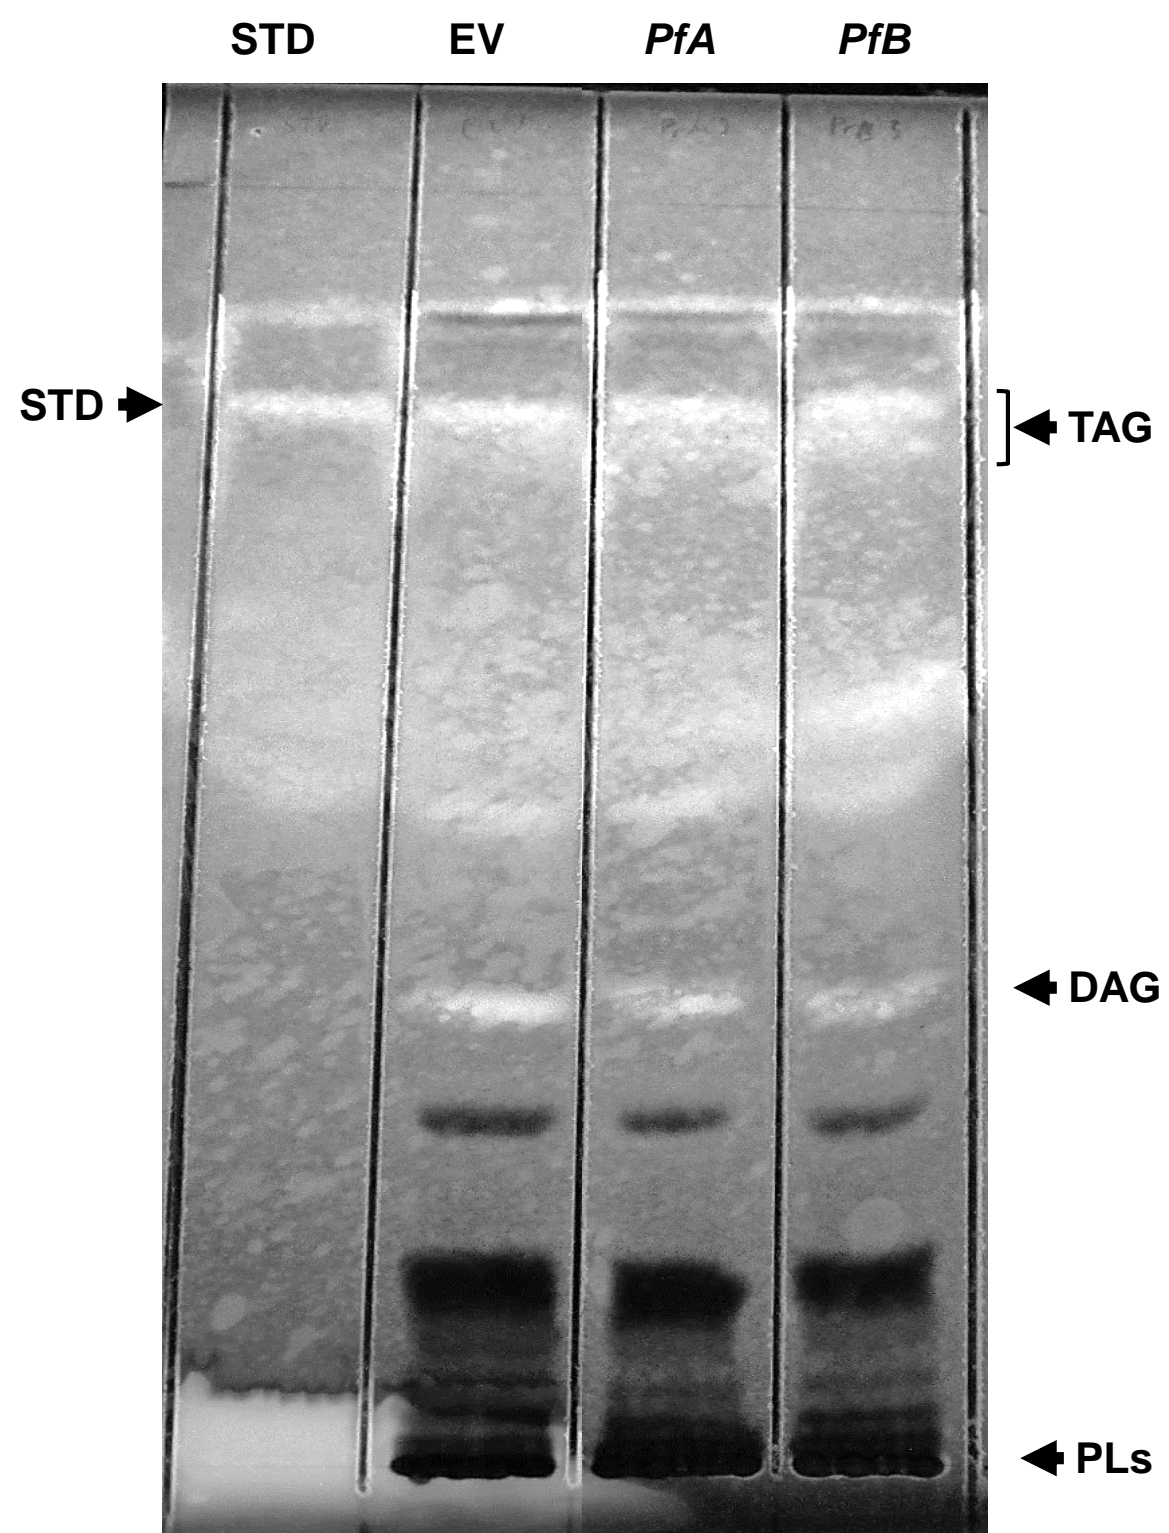

**Supplementary Figure S3. Thin layer chromatography (TLC) of neutral lipids on a silica gel plate developed with a solvent mixture of hexane/ethyl ether/acetic acid (70:30:1, v/v/v).**

TAG, triacylglycerol; DAG, diacylglycerol; PLs, polar lipids; EV, empty vector; *PfA*, *PfWRI1A*; *PfB*, *PfWRI1B*; STD, glycerol triheptadecanoate (C17:0).
